# Supplementary material for: Hydrogeological conceptual model of andesitic watersheds revealed by high-resolution heliborne geophysics
Source: Copernicus journal article supplement (doi:10.5194/hess-23-2321-2019), 2019-05-14
Supplement: Supplementary file 1 [file hess-23-2321-2019-supplement.zip]

Archive with 4 entries (4 files):
- S1 Supplementary geological photos.pdf
- Table_S1_springs_database.pdf
- hess-23-2321-2019-supplement-title-page.pdf
- Table_S2_boreholes_database.pdf
