# Supplementary material for: Hydrogeological conceptual model of andesitic watersheds revealed by high-resolution heliborne geophysics
Source: Copernicus journal article supplement (doi:10.5194/hess-23-2321-2019), 2019-05-14
Supplement: Supplementary file 1 [file hess-23-2321-2019-supplement.zip › hess-23-2321-2019-supplement-title-page.pdf]

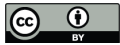

## *Supplement of*

# **Hydrogeological conceptual model of andesitic watersheds revealed by high-resolution heliborne geophysics**

**Benoit Vittecoq et al.**

*Correspondence to:* Benoit Vittecoq (b.vittecoq@brgm.fr)

- [hess-23-2321-2019-supplement-title-page.pdf](#)
- [S1 Supplementary geological photos.pdf](#)
- [Table\\_S1\\_springs\\_database.pdf](#)
- [Table\\_S2\\_boreholes\\_database.pdf](#)

The copyright of individual parts of the supplement might differ from the CC BY 4.0 License.
