# Supplementary material for: Hydrogeological conceptual model of andesitic watersheds revealed by high-resolution heliborne geophysics
Source: Copernicus journal article supplement (doi:10.5194/hess-23-2321-2019), 2019-05-14
Supplement: Supplementary file 1 [file hess-23-2321-2019-supplement.zip › S1 Supplementary geological photos.pdf]

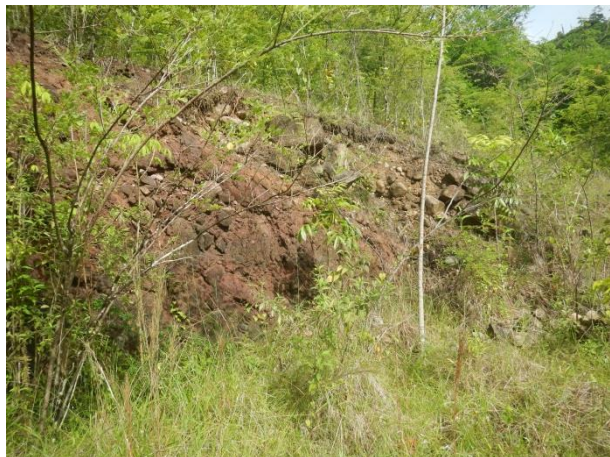

2α breccia andesitic lava flows  
(Fond Lahaye valley, 40 m NGM)

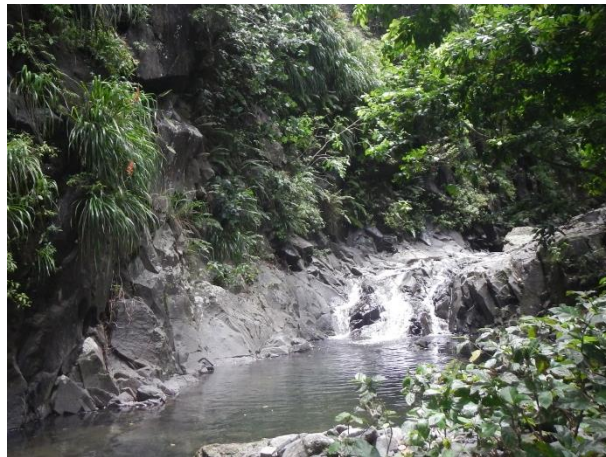

2α dark andesitic massive and fractured lava flows  
(Duclos river, 240 m NGM)

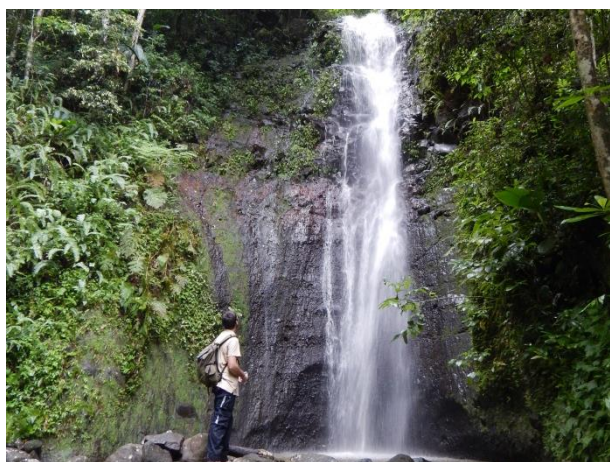

2α breccia andesitic lava flows (lower part) and  
massive and fractured lava flows (upper part)  
(Amba'So, Fond Lahaye valley, 180 m NGM)

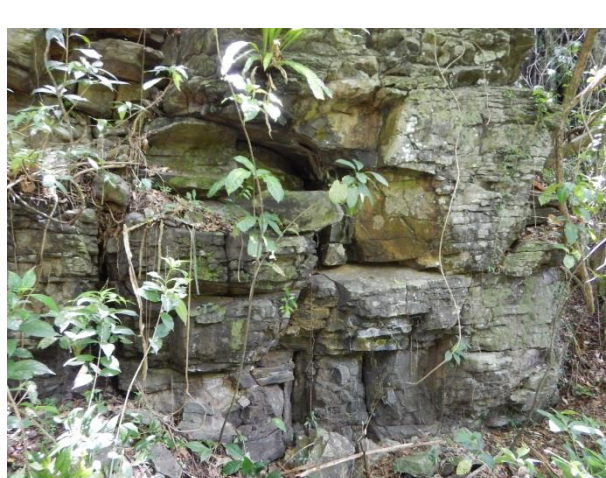

2α andesitic massive and fractured lava flows  
(Fond Lahaye valley, 75 m NGM)

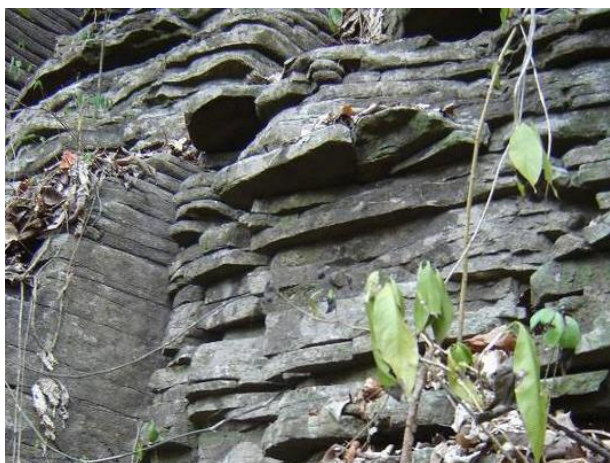

2α andesitic massive and fractured lava flows  
(Fond Lahaye valley, 100 m NGM)

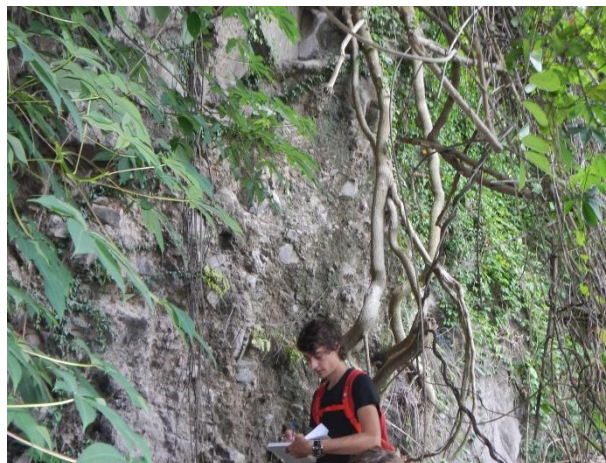

2α breccia andesitic lava flows  
(Fond Lahaye valley, 30 m NGM)

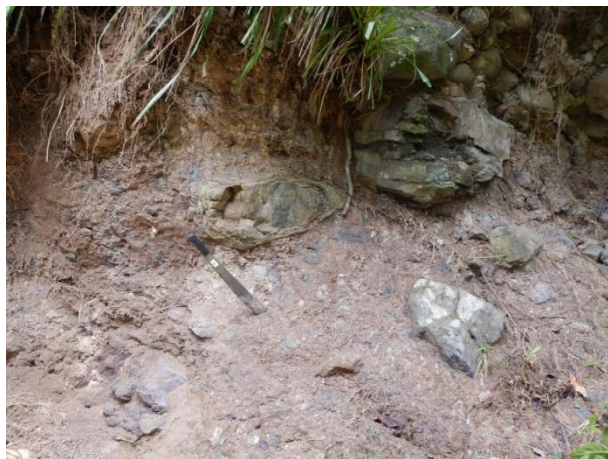

1H hyaloclastites  
(Case Navire river, 85 m NGM)

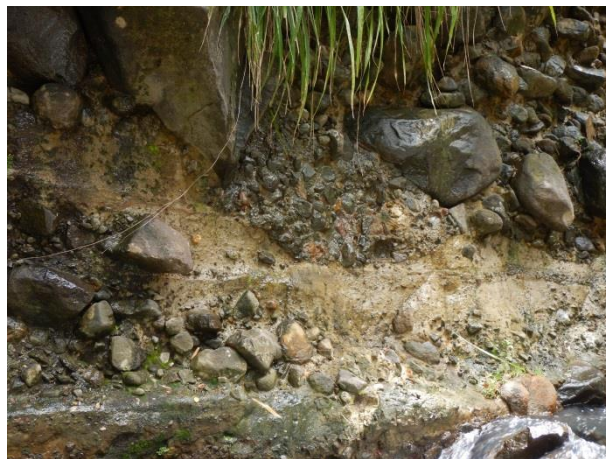

6C fluvatile conglomerates  
(Case Navire river, 91 m NGM)

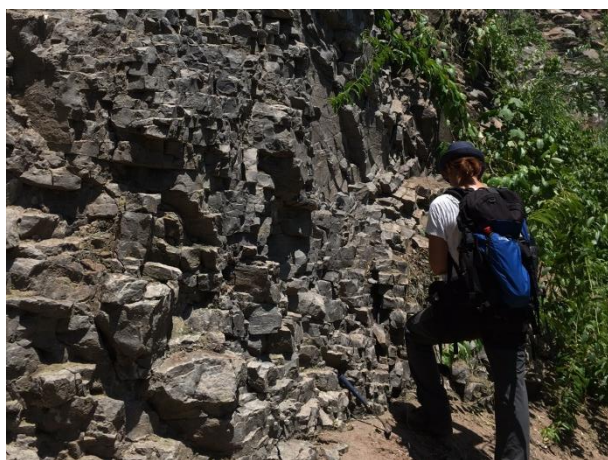

7α dark andesitic lava flows, highly fissured and fractured  
(Texaco district, 10 m NGM)

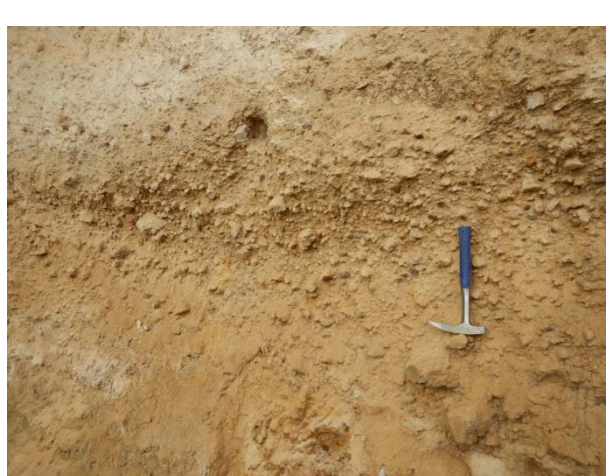

8pc pumice flows  
(Haut-Didier district, 160 m NGM)

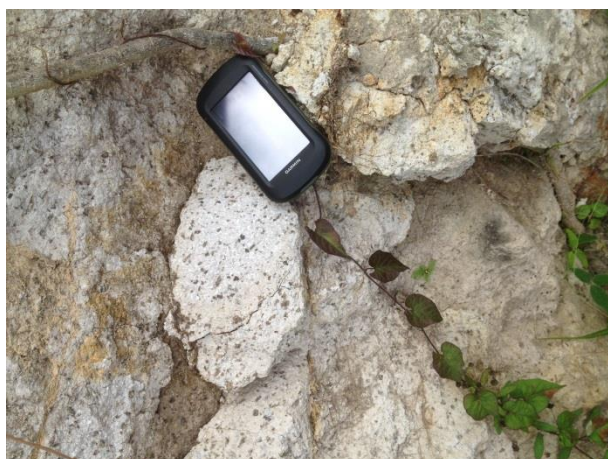

9αbi andesitic lava flow with quartz and biotite  
(Camp de Balata-Touret district, 430 m NGM)

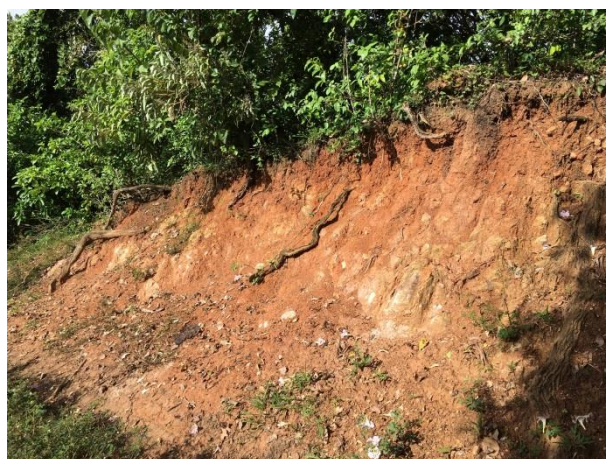

9αbi highly weathered andesitic lava flows  
(Fond Georges district, 400 m NGM)
