# Supplementary material for: Hydrogeological conceptual model of andesitic watersheds revealed by high-resolution heliborne geophysics
Source: Copernicus journal article supplement (doi:10.5194/hess-23-2321-2019), 2019-05-14
Supplement: Supplementary file 1 [file hess-23-2321-2019-supplement.zip › Table_S1_springs_database.pdf]

| City              | Place / Name             | X_WGS84<br>(m) | Y_WGS84<br>(m) | Z (amsl) | Aquifer<br>lithology | Aquifer<br>resistivity<br>(ohm m) | Discharge<br>(l s <sup>-1</sup> ) | Spring<br>conductivity<br>(μS/cm) | T°C<br>air | T°C<br>Spring | pH  | O2<br>% | O2<br>(mg l <sup>-1</sup> ) | Eh<br>(mV) |
|-------------------|--------------------------|----------------|----------------|----------|----------------------|-----------------------------------|-----------------------------------|-----------------------------------|------------|---------------|-----|---------|-----------------------------|------------|
| SAINT-JOSEPH      | Cœur Bouliki 1           | 707 965        | 1 626 096      | 296      | 1βol                 | 20 - 40                           | 1 - 2                             | 106                               | -          | -             | -   | -       | -                           | -          |
| SAINT-JOSEPH      | Cœur Bouliki 2           | 707 771        | 1 626 246      | 326      | 1βol                 | 20 - 40                           | 2 - 5                             | 131                               | 24.3       | 23.8          | 7.3 | 100     | 8.2                         | 286        |
| SAINT-JOSEPH      | Cœur Bouliki 3           | 707 451        | 1 626 363      | 317      | 1βol                 | 20 - 40                           | 1 - 2                             | 84                                | -          | -             | -   | -       | -                           | -          |
| SAINT-JOSEPH      | Cœur Bouliki 4           | 708 106        | 1 626 293      | 350      | 1βol                 | 20 - 40                           | 1 - 2                             | 86                                | -          | -             | -   | -       | -                           | -          |
| FONDS-SAINT-DENIS | Plateau Boucher 1        | 704 927        | 1 628 020      | 631      | 2α                   | 20 - 50                           | 0.1 - 0.5                         | 53                                | 23.2       | 22.8          | 5.5 | 81      | 6.5                         | 322        |
| FONDS-SAINT-DENIS | Plateau Boucher 2        | 704 928        | 1 628 021      | 631      | 2α                   | 20 - 50                           | 0.1 - 0.5                         | 71                                | 22.4       | 22.8          | 5.3 | 96      | 7.6                         | 350        |
| FONDS-SAINT-DENIS | Plateau Boucher 3        | 704 929        | 1 628 022      | 631      | 2α                   | 20 - 50                           | 0.1 - 0.5                         | 77                                | 22.4       | 22.8          | 5.2 | 49      | 3.9                         | 298        |
| SCHOELCHER        | Cascade Amba So          | 704 068        | 1 620 970      | 170      | 2α                   | 30 - 60                           | 1 - 2                             | 215                               | 24         | 22.6          | 7.9 | 80      | 6.8                         | 220        |
| SCHOELCHER        | Cascade Fond Plumet      | 704 563        | 1 620 928      | 192      | 2α                   | 30 - 60                           | 2 - 3                             | 228                               | 24         | 23.7          | 8.2 | 89      | 7.4                         | 233        |
| SCHOELCHER        | Source ferreuse 1        | 704 566        | 1 620 848      | 189      | 2α                   | 30 - 60                           | 0.1                               | 280                               | 23         | 23.7          | 6.9 | 12      | 1.0                         | -72        |
| SCHOELCHER        | Source Fond Plumet       | 704 482        | 1 620 599      | 135      | 2α                   | 30 - 60                           | 0.1                               | 232                               | 24         | 23.2          | 7.5 | 78      | 6.5                         | 143        |
| SCHOELCHER        | Source ferreuse 2        | 704 524        | 1 620 649      | 158      | 2α                   | 30 - 60                           | 0.1                               | 245                               | 23         | 23.4          | 7.0 | 0.5     | 0.1                         | -79        |
| CASE-PILOTE       | Source Vannan            | 701 667        | 1 623 899      | 350      | 2α                   | 30 - 60                           | 0.1                               | 182                               | 22         | 22.1          | 7.5 | -       | -                           | -          |
| CASE-PILOTE       | Grand Fond Ravine Dlo Dé | 702 177        | 1 623 754      | 418      | 6B                   | 50 - 120                          | 0.1                               | 290                               | 25         | 24.0          | -   | -       | -                           | -          |
| FORT-DE-FRANCE    | Concorde - Duclos 1      | 704 350        | 1 623 836      | 473      | 8ρα                  | 30 - 60                           | 0.5                               | 226                               | 23         | 22.0          | 8.3 | 103     | 8.3                         | 260        |
| FORT-DE-FRANCE    | Concorde - Duclos 2      | 704 270        | 1 623 821      | 505      | 8ρα                  | 30 - 60                           | 1                                 | 166                               | 23         | 22.0          | 7.9 | 101     | 8.5                         | 243        |
| FORT-DE-FRANCE    | Concorde - Duclos 3      | 704 190        | 1 623 883      | 498      | 8ρα                  | 30 - 60                           | 0.5                               | 349                               | 23         | 23.3          | 7.1 | 94      | 7.6                         | 237        |
| FORT-DE-FRANCE    | Source Agathe            | 705 745        | 1 622 979      | 441      | 9αbi                 | 100 - 180                         | 1 - 2                             | 132                               | 23.5       | 23.3          | 6.6 | 99      | 8.1                         | 241        |
| FORT-DE-FRANCE    | Source La Donis          | 705 936        | 1 623 420      | 509      | 9αbi                 | 100 - 180                         | 1 - 2                             | 106                               | 22.7       | 22.9          | 7.5 | 100     | 8.2                         | 219        |
| FORT-DE-FRANCE    | Source La médaille       | 705 586        | 1 625 910      | 515      | 9αbi                 | 100 - 250                         | 5 - 10                            | 131                               | 22.0       | 22.4          | 6.5 | 95      | 7.7                         | 242        |
| FONDS-SAINT-DENIS | Source de l'Alma         | 704 716        | 1 627 593      | 575      | 9αbi                 | 100 - 150                         | 1 - 2                             | 109                               | 21.9       | 21.6          | 6.4 | 87      | 7.2                         | 256        |
| FONDS-SAINT-DENIS | Source cristal           | 704 528        | 1 627 463      | 580      | 9αbi                 | 100 - 150                         | 5 - 10                            | 110                               | -          | 21.4          | 7.8 | -       | -                           | -          |
| FORT-DE-FRANCE    | Colson principale        | 705 673        | 1 264 665      | 537      | 9αbi                 | 150 - 300                         | 1 - 2                             | 130                               | 22.7       | 22.7          | 6.2 | 85      | 6.9                         | 245        |
| FORT-DE-FRANCE    | Colson secondaire        | 705 663        | 1 264 660      | 535      | 9αbi                 | 150 - 300                         | 1 - 2                             | 158                               | 22.4       | 22.4          | 6.7 | 94      | 7.7                         | 243        |
