# Supplementary material for: Hydrogeological conceptual model of andesitic watersheds revealed by high-resolution heliborne geophysics
Source: Copernicus journal article supplement (doi:10.5194/hess-23-2321-2019), 2019-05-14
Supplement: Supplementary file 1 [file hess-23-2321-2019-supplement.zip › Table_S2_boreholes_database.pdf]

| National Code | City           | Place        | X WGS84 (m) | Y WGS84 (m) | Altitude (m) | Boreholes depth (m) | Water level depth (m) | Piezometric level (m amsl) | Drilling / borehole diameter (m) | Casing diameter (m) | Depth of screen interval (m) | Drilling year | Superficial formation (argilized alluvium or weathered lavas) depth (m) | 9abi   | 8lh    | 8pc       | 8pa    | 8B     | 6C      | 6B         | 2-5C | 2α         | 1α or 1βol | 1H        | Aquifer main lithology | Pumping test yield (m³ h⁻¹) | Transmissivity (m² s⁻¹) | Hydraulic conductivity (m s⁻¹) |
|---------------|----------------|--------------|-------------|-------------|--------------|---------------------|-----------------------|----------------------------|----------------------------------|---------------------|------------------------------|---------------|-------------------------------------------------------------------------|--------|--------|-----------|--------|--------|---------|------------|------|------------|------------|-----------|------------------------|-----------------------------|-------------------------|--------------------------------|
| 1173ZZ0020    | FORT-DE-FRANCE | Colson       | 706 056     | 1 625 115   | 581.0        | 23                  | -                     | -                          | 0.116                            | -                   | -                            | 1970          | -                                                                       | -      | -      | -         | 0 - 23 | -      | -       | -          | -    | -          | -          | -         | -                      | -                           | -                       | -                              |
| 1173ZZ0021    | FORT-DE-FRANCE | Colson       | 706 076     | 1 625 190   | 579.0        | 20                  | -                     | -                          | 0.116                            | -                   | -                            | 1970          | -                                                                       | -      | -      | -         | 0 - 9  | -      | -       | -          | -    | -          | 9 - 20     | -         | -                      | -                           | -                       | -                              |
| 1173ZZ0022    | FORT-DE-FRANCE | Colson       | 706 086     | 1 625 310   | 585.0        | 16                  | -                     | -                          | 0.116                            | -                   | -                            | 1970          | -                                                                       | 0 - 9  | -      | -         | -      | -      | -       | -          | -    | -          | 9 - 16     | -         | -                      | -                           | -                       | -                              |
| 1173ZZ0023    | FORT-DE-FRANCE | Colson       | 706 146     | 1 625 150   | 570.0        | 20                  | -                     | -                          | 0.116                            | -                   | -                            | 1970          | -                                                                       | 0 - 19 | -      | -         | -      | -      | -       | -          | -    | -          | 19 - 20    | -         | -                      | -                           | -                       | -                              |
| 1173ZZ0024    | FORT-DE-FRANCE | Colson       | 705 986     | 1 625 270   | 580.0        | 20                  | -                     | -                          | 0.116                            | -                   | -                            | 1970          | -                                                                       | -      | -      | -         | 0 - 20 | -      | -       | -          | -    | -          | -          | -         | -                      | -                           | -                       | -                              |
| 1173ZZ0025    | FORT-DE-FRANCE | Colson       | 706 046     | 1 624 750   | 555.0        | 20                  | -                     | -                          | 0.096                            | -                   | -                            | 1973          | -                                                                       | 0 - 20 | -      | -         | -      | -      | -       | -          | -    | -          | -          | -         | -                      | -                           | -                       | -                              |
| 1173ZZ0026    | FORT-DE-FRANCE | Colson       | 705 926     | 1 624 640   | 531.2        | 16                  | -                     | -                          | 0.116                            | -                   | -                            | 1973          | -                                                                       | 0 - 16 | -      | -         | -      | -      | -       | -          | -    | -          | -          | -         | -                      | -                           | -                       | -                              |
| 1173ZZ0027    | FORT-DE-FRANCE | Colson       | 705 786     | 1 624 450   | 529.9        | 19                  | -                     | -                          | 0.116                            | -                   | -                            | 1973          | -                                                                       | 0 - 19 | -      | -         | -      | -      | -       | -          | -    | -          | -          | -         | -                      | -                           | -                       | -                              |
| 1173ZZ0029    | FORT-DE-FRANCE | Absalon      | 705 086     | 1 623 470   | 350.0        | 19                  | Artesian              | -                          | 0.116                            | -                   | -                            | 1973          | 0 - 2                                                                   | -      | -      | -         | -      | -      | -       | -          | -    | 2 - 19     | -          | -         | 2α                     | -                           | -                       | -                              |
| 1173ZZ0030    | FORT-DE-FRANCE | Absalon      | 705 096     | 1 623 490   | 350.0        | 50                  | -                     | -                          | -                                | -                   | -                            | 1978          | 0 - 4                                                                   | -      | -      | -         | -      | -      | -       | -          | -    | 4 - 50     | -          | -         | 2α                     | 6                           | 7.0E-04                 | 1.5E-05                        |
| 1173ZZ0035    | FORT-DE-FRANCE | Absalon      | 705 066     | 1 623 460   | 349.0        | 68                  | 15.06                 | 334                        | 0.200                            | 0.100               | 26 - 68                      | 1982          | -                                                                       | -      | -      | -         | -      | -      | -       | -          | -    | 0 - 68     | -          | -         | 2α                     | 6                           | 5.0E-04                 | 1.2E-05                        |
| 1173ZZ0050    | FORT-DE-FRANCE | Les nuages   | 705 666     | 1 625 460   | 580.0        | 23                  | -                     | -                          | -                                | -                   | -                            | 1995          | 0 - 7                                                                   | -      | -      | -         | -      | -      | -       | -          | -    | 7 - 23     | -          | -         | -                      | -                           | -                       | -                              |
| 1173ZZ0051    | FORT-DE-FRANCE | Les nuages   | 705 686     | 1 625 470   | 580.0        | 20                  | -                     | -                          | -                                | -                   | -                            | 1995          | 0 - 10                                                                  | -      | -      | -         | -      | -      | -       | -          | -    | 10 - 20    | -          | -         | -                      | -                           | -                       | -                              |
| 1173ZZ0053    | FORT-DE-FRANCE | Balata       | 705 556     | 1 623 050   | 430.0        | 20                  | -                     | -                          | -                                | -                   | -                            | 1995          | -                                                                       | 0 - 20 | -      | -         | -      | -      | -       | -          | -    | -          | -          | -         | -                      | -                           | -                       | -                              |
| 1173ZZ0058    | FORT-DE-FRANCE | Alma         | 705 666     | 1 626 620   | 472.0        | 15                  | -                     | -                          | -                                | -                   | -                            | 1997          | -                                                                       | -      | -      | -         | -      | 0 - 15 | -       | -          | -    | -          | -          | -         | -                      | -                           | -                       | -                              |
| 1173ZZ0139    | FORT-DE-FRANCE | Fond Barron  | 705 525     | 1 624 054   | 399.0        | 39                  | 1                     | 398                        | 0.131                            | 0.119               | -                            | 2013          | 0 - 3,4                                                                 | -      | -      | -         | -      | -      | -       | -          | -    | 3,4 - 38,5 | -          | -         | -                      | -                           | -                       | -                              |
| 1173ZZ0140    | FORT-DE-FRANCE | Fond Barron  | 705 252     | 1 624 500   | 491.0        | 71                  | 4                     | 487                        | 0.131                            | 0.119               | -                            | 2013          | 0 - 14,5                                                                | -      | -      | -         | -      | -      | -       | -          | -    | 14,5 - 71  | -          | -         | -                      | -                           | -                       | -                              |
| 1174ZZ0044    | SAINT-JOSEPH   | Roches gales | 707 336     | 1 626 390   | 320.0        | 52                  | 6.77                  | 313                        | 0.140                            | 0.116               | 21,5 - 52                    | 1973          | 0 - 7                                                                   | -      | -      | -         | -      | -      | -       | -          | -    | -          | 7 - 52     | -         | 1βol                   | 7                           | 1.0E-03                 | 3.3E-05                        |
| 1174ZZ0133    | SAINT-JOSEPH   | Cœur Bouliki | 707 697     | 1 626 154   | 298.0        | 72                  | 2                     | 296                        | 0.220                            | 0.180               | 20 - 70                      | 2010          | 0 - 10                                                                  | -      | -      | -         | -      | -      | -       | -          | -    | -          | 10 - 70    | 70 - 71,6 | 1βol                   | 38                          | 1.30E-03                | 2.6E-05                        |
| 1174ZZ0134    | SAINT-JOSEPH   | Cœur Bouliki | 707 551     | 1 626 222   | 303.0        | 88                  | 3                     | 300                        | 0.245                            | 0.180               | 18,5 - 70                    | 2010          | 0 - 15                                                                  | -      | -      | -         | -      | -      | -       | -          | -    | -          | 15 - 88    | -         | 1βol                   | 50                          | 9.00E-04                | 1.7E-05                        |
| 1177ZZ0015    | CASE-PILOTE    | Fond Bourlet | 701 406     | 1 618 910   | 6.0          | 15                  | -                     | -                          | 0.146                            | 0.116               | -                            | 1968          | 0 - 13                                                                  | -      | -      | -         | -      | -      | -       | 13 - 15    | -    | -          | -          | -         | -                      | -                           | -                       | -                              |
| 1177ZZ0024    | SCHOELCHER     | Fond Lahaye  | 703 426     | 1 617 790   | 0.5          | 30                  | 0.5                   | 0                          | 0.140                            | 0.116               | -                            | 1970          | 0 - 30                                                                  | -      | -      | -         | -      | -      | -       | -          | -    | -          | -          | -         | -                      | -                           | -                       | -                              |
| 1177ZZ0030    | FORT-DE-FRANCE | Didier       | 705 386     | 1 621 490   | 210.0        | 15                  | 0                     | -                          | 0.140                            | 0.116               | -                            | 1970          | 0 - 11                                                                  | -      | -      | -         | -      | -      | 11 - 15 | -          | -    | -          | -          | -         | -                      | -                           | -                       | -                              |
| 1177ZZ0046    | SCHOELCHER     | Case Navire  | 704 586     | 1 616 890   | 3.3          | 25                  | -                     | -                          | 0.146                            | 0.140               | -                            | 1972          | 0 - 25                                                                  | -      | -      | -         | -      | -      | -       | -          | -    | -          | -          | -         | -                      | -                           | -                       | -                              |
| 1177ZZ0047    | SCHOELCHER     | Case Navire  | 704 606     | 1 616 880   | 0.7          | 19                  | -                     | -                          | 0.146                            | 0.140               | -                            | 1972          | 0 - 19                                                                  | -      | -      | -         | -      | -      | -       | -          | -    | -          | -          | -         | -                      | -                           | -                       | -                              |
| 1177ZZ0049    | SCHOELCHER     | Anse Madame  | 704 476     | 1 616 990   | 2.8          | 25                  | -                     | -                          | 0.140                            | 0.116               | -                            | 1972          | 0 - 22                                                                  | -      | -      | -         | -      | -      | -       | -          | -    | 22 - 24    | -          | -         | -                      | -                           | -                       | -                              |
| 1177ZZ0075    | CASE-PILOTE    | Case Pilote  | 700 886     | 1 620 430   | 28.0         | 35                  | 14                    | 14                         | 0.116                            | -                   | -                            | 1972          | 0 - 21,5                                                                | -      | -      | -         | -      | -      | -       | 21,5 - 35  | -    | -          | -          | 6B        | 2                      | 2.30E-04                    | 1.7E-05                 |                                |
| 1177ZZ0076    | CASE-PILOTE    | Case Pilote  | 700 626     | 1 619 990   | 10.0         | 45                  | 5                     | 6                          | 0.116                            | -                   | -                            | 1973          | 0 - 3,2                                                                 | -      | -      | -         | -      | -      | -       | 3,2 - 37,7 | -    | -          | 37,7 - 45  | 6B        | 2                      | 2.75E-05                    | 8.0E-07                 |                                |
| 1177ZZ0077    | CASE-PILOTE    | Maniba haut  | 701 186     | 1 620 740   | 42.0         | 55                  | 29                    | 13                         | -                                | -                   | -                            | 1973          | 0 - 9                                                                   | -      | -      | -         | -      | -      | -       | -          | -    | -          | -          | 6B        | 2                      | 3.45E-04                    | 7.5E-06                 |                                |
| 1177ZZ0078    | SCHOELCHER     | Case Navire  | 704 977     | 1 617 594   | 13.2         | 60                  | 3                     | 11                         | 0.550                            | 0.300               | 18 - 59                      | 1973          | 0 - 26                                                                  | -      | -      | 26 - 60   | -      | -      | -       | -          | -    | -          | -          | 39        | 4.80E-04               | 1.2E-05                     |                         |                                |
| 1177ZZ0079    | SCHOELCHER     | Case Navire  | 705 199     | 1 617 613   | 15.2         | 54                  | 3                     | 12                         | 0.165                            | 0.115               | -                            | 1973          | 0 - 18                                                                  | -      | -      | 18 - 51   | -      | -      | -       | -          | -    | 51 - 53,5  | -          | -         | 2α, 8pc                | 2                           | 1.30E-04                | 3.7E-06                        |
| 1177ZZ0080    | SCHOELCHER     | Case Navire  | 704 686     | 1 617 510   | 10.2         | 48                  | -                     | -                          | 0.165                            | 0.115               | -                            | 1973          | 0 - 20                                                                  | -      | -      | 20 - 47,5 | -      | -      | -       | -          | -    | -          | -          | -         | -                      | -                           | -                       | -                              |
| 1177ZZ0094    | SCHOELCHER     | Fond Lahaye  | 703 515     | 1 618 068   | 2.6          | 30                  | 1.35                  | 1                          | 0.140                            | 0.116               | -                            | 1977          | 0 - 28                                                                  | -      | -      | -         | -      | -      | -       | -          | -    | 28 - 30    | -          | -         | -                      | -                           | -                       | -                              |
| 1177ZZ0095    | SCHOELCHER     | Fond Lahaye  | 703 493     | 1 618 008   | 2.1          | 20                  | 0.80                  | 1                          | 0.140                            | 0.116               | -                            | 1977          | 0 - 20                                                                  | -      | -      | -         | -      | -      | -       | -          | -    | -          | -          | -         | -                      | -                           | -                       | -                              |
| 1177ZZ0131    | FORT-DE-FRANCE | Morne Coco   | 706 676     | 1 619 300   | 189.0        | 10                  | -                     | -                          | 0.096                            | -                   | -                            | 1981          | -                                                                       | -      | -      | 0 - 10    | -      | -      | -       | -          | -    | -          | -          | -         | -                      | -                           | -                       | -                              |
| 1177ZZ0161    | SCHOELCHER     | Fond Lahaye  | 703 986     | 1 619 270   | 40.6         | 46                  | 3.03                  | 38                         | 0.220                            | 0.160               | 26 - 44                      | 1988          | 0 - 14                                                                  | -      | -      | -         | -      | -      | -       | -          | -    | -          | -          | 1α        | 42                     | 4.4E-04                     | 2.4E-05                 |                                |
| 1177ZZ0165    | SCHOELCHER     | Case Navire  | 705 191     | 1 617 845   | 19.0         | 51                  | 4                     | 15                         | 0.255                            | 0.152               | 15 - 46                      | 1989          | 0 - 5                                                                   | -      | -      | 5 - 33    | -      | -      | -       | -          | -    | 33 - 51    | -          | -         | -                      | -                           | -                       | -                              |
| 1177ZZ0166    | SCHOELCHER     | Case Navire  | 705 189     | 1 617 847   | 18.9         | 51                  | 4                     | 15                         | 0.255                            | 0.152               | 15 - 46                      | 1989          | 0 - 12                                                                  | -      | -      | 12 - 33   | -      | -      | -       | -          | -    | 33 - 51    | -          | -         | 8pc                    | 39                          | 5.50E-04                | 1.8E-05                        |
| 1177ZZ0173    | CASE-PILOTE    | Maniba       | 700 513     | 1 620 050   | 11.6         | 21                  | 6                     | 6                          | 0.220                            | 0.125               | 11 - 21                      | 2004          | 0 - 2                                                                   | -      | -      | -         | 2 - 21 | -      | -       | -          | -    | -          | -          | -         | 8pc                    | -                           | -                       | -                              |
| 1177ZZ0175    | FORT-DE-FRANCE | Morne Coco   | 706 218     | 1 619 724   | 170.0        | 8                   | -                     | -                          | -                                | -                   | -                            | 2005          | -                                                                       | -      | -      | 0 - 8     | -      | -      | -       | -          | -    | -          | -          | -         | -                      | -                           | -                       | -                              |
| 1177ZZ0176    | SCHOELCHER     | Fond Lahaye  | 704 113     | 1 619 964   | 80.0         | 84                  | 8.84                  | 71                         | 0.193                            | 0.125               | 20 - 80                      | 2007          | 0 - 26                                                                  | -      | -      | -         | -      | -      | -       | -          | -    | -          | 26 - 84    | -         | 1α                     | 17                          | 5.3E-04                 | 8.8E-06                        |
| 1177ZZ0177    | SCHOELCHER     | Fond Lahaye  | 704 074     | 1 619 789   | 76.3         | 62                  | 8.32                  | 68                         | 0.193                            | 0.125               | 22 - 62                      | 2007          | 0 - 22                                                                  | -      | -      | -         | -      | -      | -       | -          | -    | -          | 22 - 62    | -         | 1α                     | -                           | 5.5E-04                 | 1.4E-05                        |
| 1177ZZ0178    | SCHOELCHER     | Fond Lahaye  | 704 116     | 1 619 966   | 80.4         | 60                  | 8.91                  | 71                         | 0.311                            | 0.193               | 24 - 60                      | 2008          | 0 - 21                                                                  | -      | -      | -         | -      | -      | -       | -          | -    | -          | 21 - 60    | -         | 1α                     | 25                          | 6.5E-04                 | 1.8E-05                        |
| 1177ZZ0181    | SCHOELCHER     | Case Navire  | 705 189     | 1 617 847   | -            | 56                  | -                     | -                          | 0.311                            | 0.191               | 35 - 56                      | 2013          | 0 - 23                                                                  | -      | -      | 23 - 41   | -      | -      | -       | -          | -    | 41 - 56    | -          | -         | 2α                     | 25                          | 2.7E-04                 | 1.3E-05                        |
| 1177ZZ0202    | FORT-DE-FRANCE | Mabelo       | 705 359     | 1 621 590   | 200.0        | 98                  | 41.2                  | 159                        | 0.203                            | 0.124               | 53 - 97                      | 2008          | -                                                                       | -      | 0 - 16 | -         | -      | -      | -       | -          | -    | 16 - 98    | -          | -         | 2α                     | 17                          | 1.0E-04                 | 2.3E-06                        |
| 1178ZZ1039    | FORT-DE-FRANCE | Rodate       | 707 436     | 1 621 050   | 295.0        | 25                  | -                     | -                          | -                                | -                   | -                            | 1985          | -                                                                       | -      | -      |           |        |        |         |            |      |            |            |           |                        |                             |                         |                                |
